# Supplementary material for: High-throughput sensing microtiter plate for determination of biogenic amines in seafood using fluorescence or eye-vision
Source: Royal Society of Chemistry journal article supplement (doi:10.1039/c1an15049a), 2011-01-01
Supplement: c1an15049a.pdf [file c1an15049a.pdf]

## Supporting Information to

# High-Throughput Sensing Microtiter Plate for Determination of Biogenic Amines in Sea Food Using Fluorescence or Eye-Vision

**H.A. Azab, S.A. El-Korashy, Z.M. Anwar, and G.M. Khairy**

*Chemistry Department, Faculty of Science, Suez Canal University, 41522 Ismailia, Egypt*

**Mark-Steven Steiner and Axel Duerkop\***

*Institute of Analytical Chemistry, Chemo- and Biosensors, University of Regensburg, D-93040 Regensburg, Germany*

Figure S1: High throughput sensing microtiter plate for BAs in unreacted state

Figure S2: Effect of TCA extracts on the sensing plate (orange spots indicate decomposed pyrylium dye; the blue spots (left) indicate untreated Py1).

Figure S3: Plots for histamine determination in spiked sea food samples after a) one day, b) three days and c) five days.

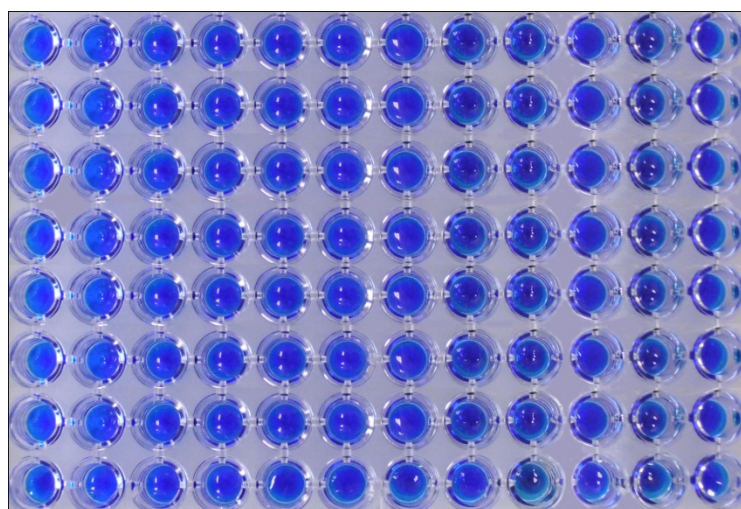

Figure S1: High throughput sensing microtiter plate for BAs in unreacted state

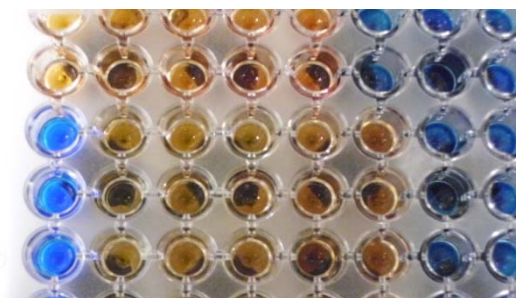

Figure S2: Effect of TCA extracts on the sensing plate (orange spots indicate decomposed pyrylium dye; the blue spots (left) indicate untreated Py1).

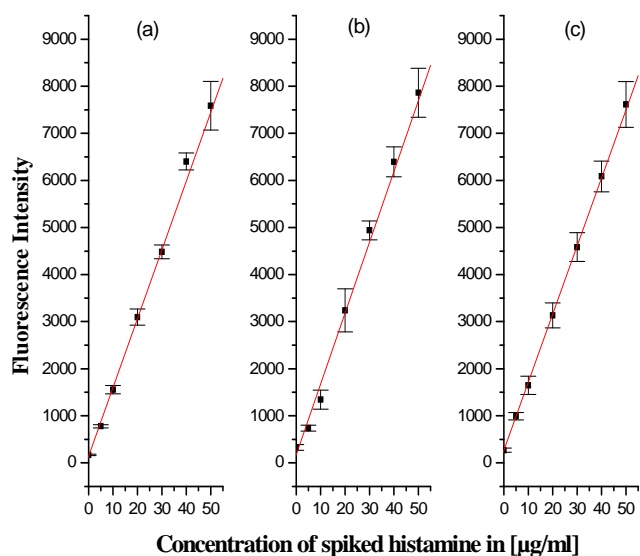

Codfish

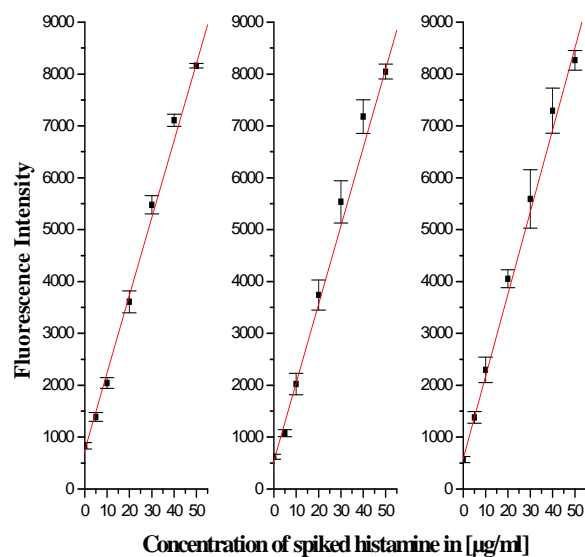

Salmon filet

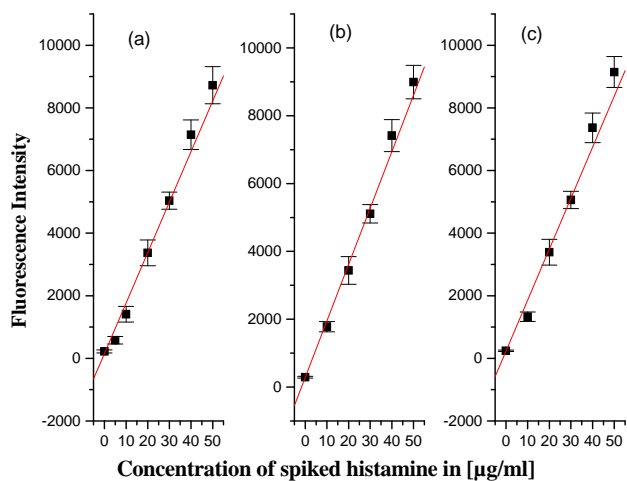

Shrimp

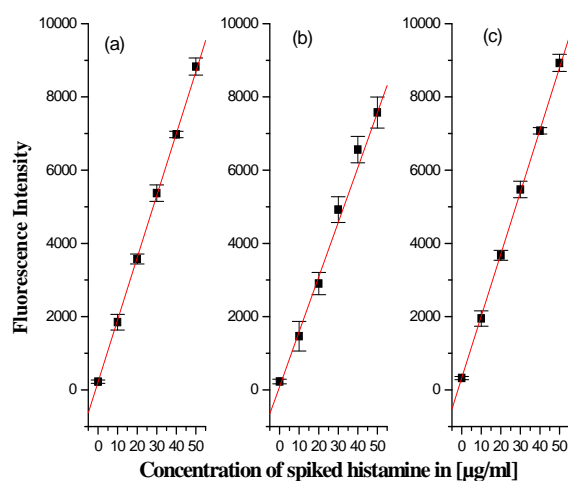

Tuna

Figure S3: Plots for histamine determination in spiked sea food samples after a) one day, b) three days and c) five days.
